# Supplementary material for: C-Raf promotes Angiogenesis during Normal Growth Plate Maturation
Source: Oxford University Press journal article supplement (doi:10.1242/dev.127142), 2015-01-01
Supplement: dev127142supp.pdf [file dev127142supp.pdf]

**Table S1. RT-qPCR primers**

|          | Forward                 | Reverse                  |
|----------|-------------------------|--------------------------|
| Actin    | CCTCTATGCCAACACAGTGC    | ACATCTGCTGGAAGGTGGAC     |
| Col X    | GGGAAACAGGATATGGCTCTC   | AGCCGTTTTACCTCTTCTTC     |
| OP       | TGCACCCAGATCCTATAGCC    | CTCCATCGTCATCATCATCG     |
| c-Raf E3 | ACTGTGGTCAATGTGCGGAA    | GCGTGCTTTCTTACCTTTGTG    |
| A-Raf    | AACCGCCGACAGTTCTACCAC   | TCCTCCAATCCTTCTTTCACTGG  |
| B-Raf    | GGCATGGATTACTTACACGCC   | GCCGGTCATCAGTTCGTACA     |
| VEGF-164 | TGCAGGCTGCTGTAACGATG    | GAACAAGGCTCACAGTGATTTTCT |
| VEGF-188 | TGCAGGCTGCTGTAACGATG    | CTCCAGGATTTAAACCGGGATT   |
| CTGF     | GCACTGCCAAAGATGGT       | TCGCATCATAGTTGGGTC       |
| CRYAB    | CCTCTTCTCAACAGCCACTT    | TTGCCGTGGACCTCAATC       |
| Fgf2     | TTGTGTCTATCAAGGGAGTGTGT | TGCCACATACCAACTGGAGTATT  |
| Fgf18    | CCGTAGGATCAGTGCCCGTG    | CCCCACGAGCTTGCCTTTTTC    |
| Wnt5a    | GGGACAACCTCCAAGAGAAACA  | GTACCAGGTTTCCTGCAACT     |
| Hdac4    | GCTACTTTAACTCCGTGGCA    | CTCATCTGGTGCTCCACTTC     |
| Nkx3.2   | AAGAGAACGAGGGCAGGA      | CAGGGCTAACGCTGTCATC      |
